# Supplementary material for: Evaluation of Different Interstimulus Rinse Protocols on Smoke Attribute Perception in Wildfire-Affected Wines
Source: MDPI journal article supplement (doi:10.3390/molecules26185444), 2021-09-07
Supplement: s1 [file s1]

## Supplementary material

### Evaluation of Different Interstimulus Rinse Protocols on Smoke Attribute Perception in Wildfire-Affected Wines

Jenna A. Fryer <sup>1</sup>, Thomas S. Collins <sup>2</sup> and Elizabeth Tomasino <sup>1,\*</sup>

<sup>1</sup> Department of Food Science and Technology, Oregon State University, Corvallis, 97331 OR, USA; jenna.fryer@oregonstate.edu (J.A.F.); tom.collins@wsu.edu (T.S.C.)

<sup>2</sup> Viticulture and Enology Program, Washington State University, Richland, 99354 WA, USA; tom.collins@wsu.edu

\* Correspondence: Elizabeth.tomasino@oregonstate.edu

Table S1. Basic chemical analysis of three smoke levels of wine.

|                   | pH   | TA<br>(g/L) | ABV<br>(%) | Acetic acid<br>(g/L) | Glucose/Fructose<br>(g/L) | Malic acid<br>(g/L) | Lactic acid<br>(g/L) | Free SO <sub>2</sub><br>(ppm) | Total SO <sub>2</sub><br>(ppm) |
|-------------------|------|-------------|------------|----------------------|---------------------------|---------------------|----------------------|-------------------------------|--------------------------------|
| High<br>Smoke     | 3.26 | 6.71        | 14.42      | 0.18                 | 0.32                      | 0.77                | 0.29                 | 14                            | 59                             |
| Moderate<br>Smoke | 3.34 | 6.69        | 14.39      | 0.23                 | 0.33                      | 0.71                | 0.33                 | 23                            | 83                             |
| Low<br>Smoke      | 3.55 | 6.00        | 14.42      | 0.28                 | 0.34                      | 0.55                | 0.61                 | 26                            | 111                            |

Table S2: Concentration of non-marker smoke phenolic compounds measured in the three wines used for sensory analysis. All values are reported in µg/L.

|                   | 2,6-xilenol | 4-Ethylguaiacol | 2-Ethylphenol | Eugenol | 4-Ethylphenol | 3,4-Xylenol | Syringol |
|-------------------|-------------|-----------------|---------------|---------|---------------|-------------|----------|
| High<br>Smoke     | n.d         | 2.86            | 0.22          | n.d     | n.d           | 16.26       | n.d      |
| Moderate<br>Smoke | n.d         | 1.16            | 0.06          | n.d     | 6.84          | 16.44       | n.d      |
| Low<br>Smoke      | n.d         | n.d             | n.d           | n.d     | n.d           | 13.06       | n.d      |

n.d indicates concentration is below quantification limits

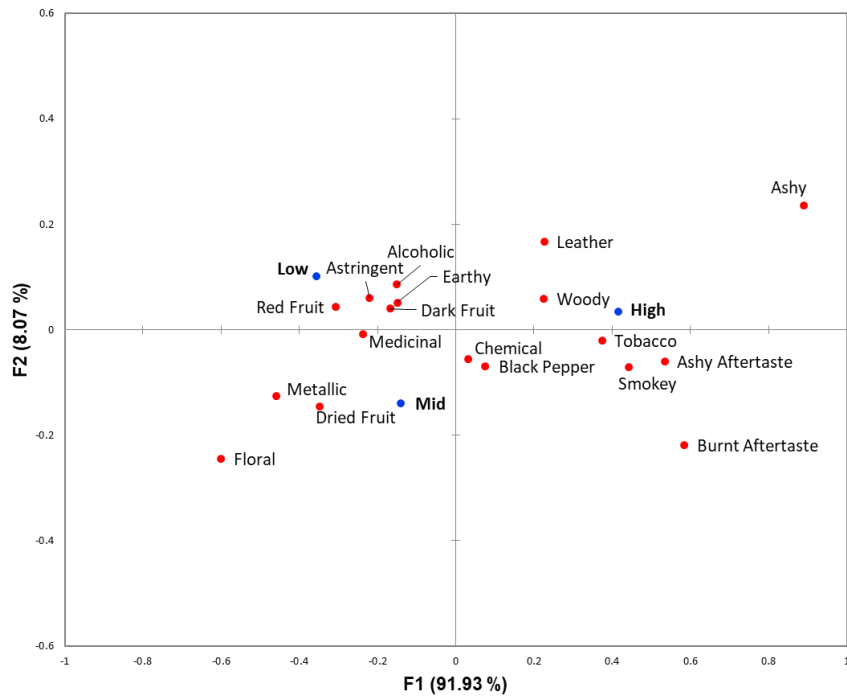

Figure S1: Symmetric plot from correspondence analysis of CATA selections (red points) for each wine (blue points)

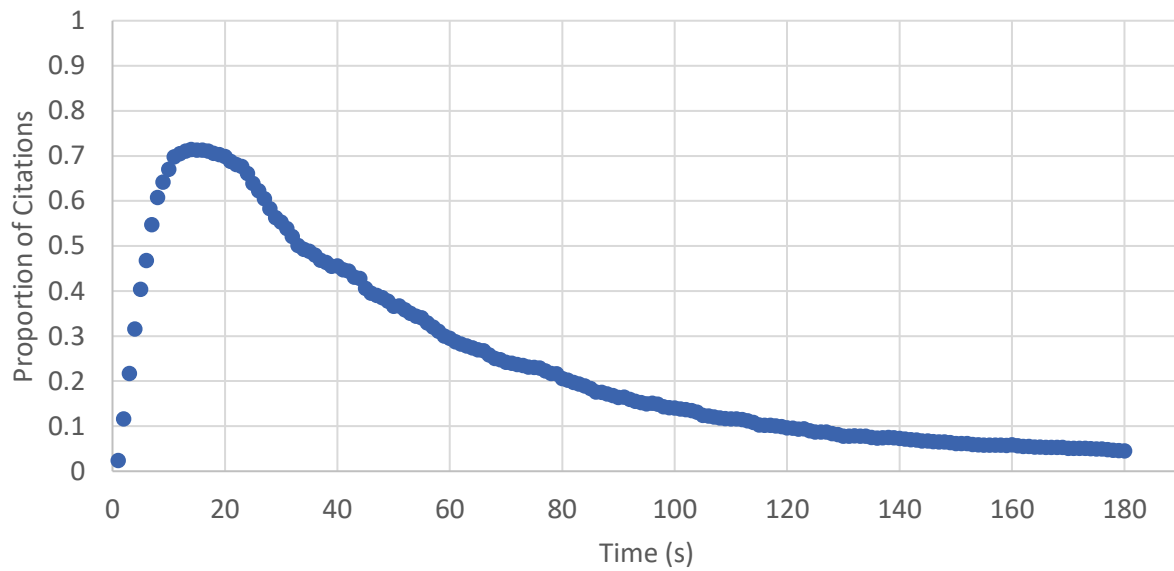

Figure S2: Proportion of overall citations (n=1644) across all attributes over 180 seconds, with a water rinse used at 10 seconds, from TCATA analysis

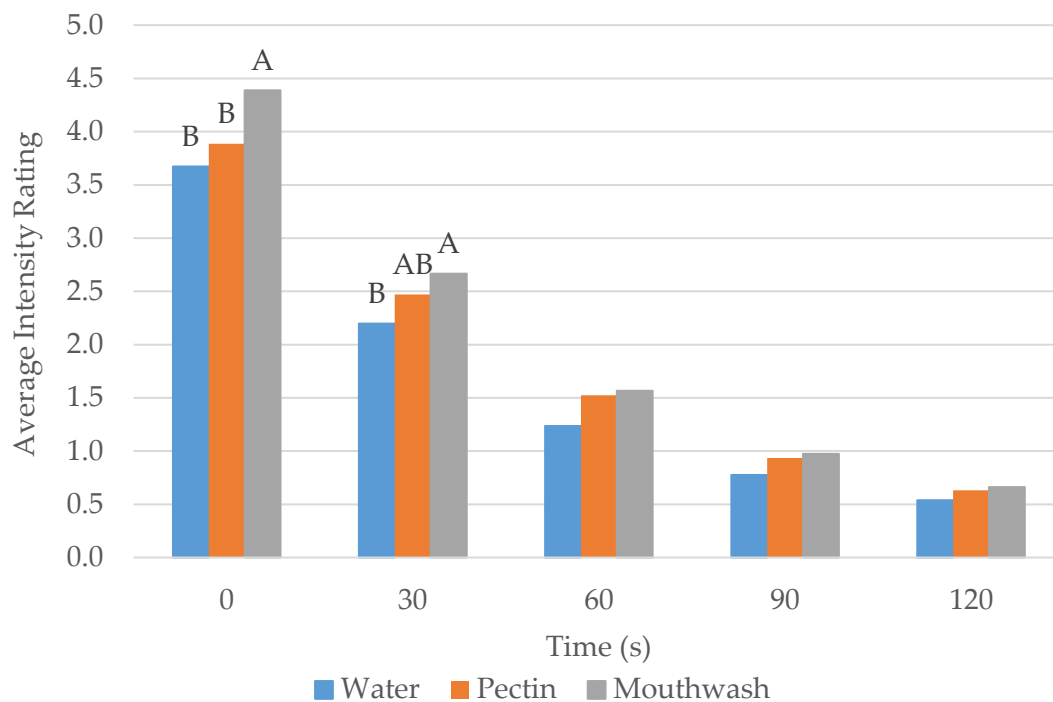

Figure S3: Average mixed berry intensity over all wines at each evaluation time for water (blue), pectin (orange), and mouthwash (grey). Same letters above bars indicate no statistical difference within each attribute as determined by Tukey HSD comparison of means at a 95% confidence level

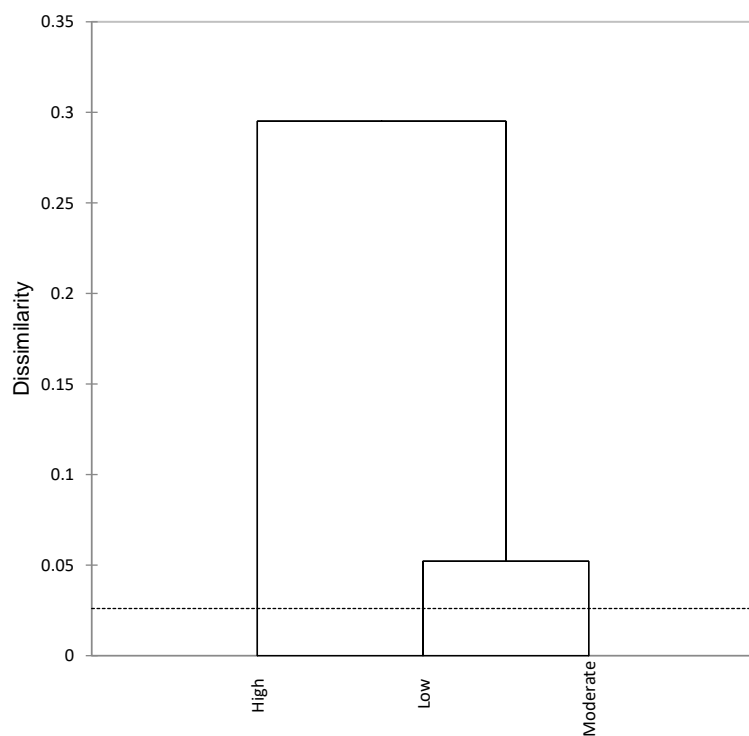

Figure S4: Separation of wines from agglomerative hierarchical clustering from CATA analysis

Video 1: <https://youtu.be/HPqovhqHTKY>
